# Supplementary material for: Effect of water-based aerobic training on anthropometric, biochemical, cardiovascular, and explosive strength parameters in young overweight and obese women: a randomized controlled trial
Source: PeerJ. 2025 Feb 21;13:e19020. doi: 10.7717/peerj.19020 (PMC11849503; doi:10.7717/peerj.19020)
Supplement: Supplemental Information 1 [file peerj-13-19020-s001.xlsx]

## Sheet: Feuil1
Groups	Age	Body Weight (Kg)			Body height (m)	BMI (kg/m2)			SJ (cm)			CMJ (cm)			MBT (m)			Resting HR (bpm)			Resting Systolic BP (mm Hg)			Resting Diastolic BP (mm Hg)			Festing Glycemia (mmol/L)			Total Cholesterol (mmol/L)			HDL (mmol/L)			LDL(mmol\L)			TG (mmol/L)			Body Fat (%)
		Test	Retest	Δ change (%)		Test	Retest	Δ change (%)	Test	Retest	Δ change (%)	Test	Retest	Δ change (%)	Test	Retest	Δ change (%)	Test	Retest	Δ change (%)	Test	Retest	Δ change (%)	Test	Retest	Δ change (%)	Test	Retest	Δ change (%)	Test	Retest	Δ change (%)	Test	Retest	Δ change (%)	Test	Retest	Δ change (%)	Test	Retest	Δ change (%)	Test	Retest	Δ change (%)
1	25	76.4	75	-1.83246	1.51	33.51	32.89	-1.85019	13.5	13.8	2.22222	12.8	13.2	3.125	2.18	3.2	46.789	74	72	-2.7027	109	114	4.58716	60	65	8.33333	5.19	4.98	-4.04624	4.33	4.05	-6.46651	3.25	3.53	8.61538	0.73	0.62	-15.0685	0.78	0.62	-20.5128	40.3	39.82	-1.19107
1	22	80	76	-5	1.76	25.83	25.34	-1.89702	24.3	25.9	6.58436	27.6	27.98	1.37681	2.91	3.45	18.5567	74	72	-2.7027	114	118	3.50877	71	75	5.6338	5.23	5.03	-3.82409	3.96	3.81	-3.78788	2.86	2.93	2.44755	0.66	0.62	-6.06061	0.97	0.58	-40.2062	30.7	29.1	-5.21173
1	23	74	72	-2.7027	1.67	26.53	26.07	-1.73389	18.7	19.2	2.6738	20.3	21.4	5.41872	2.48	3.95	59.2742	72	71	-1.38889	102	109	6.86275	66	69	4.54545	5.28	5.1	-3.40909	3.8	3.56	-6.31579	3.41	3.2	-6.15836	0.15	0.13	-13.3333	0.53	0.51	-3.77358	31.7	30.87	-2.6183
1	21	77.5	74	-4.51613	1.56	31.85	30.81	-3.26531	13.8	14.5	5.07246	16.7	17.2	2.99401	2.07	3.1	49.7585	75	71	-5.33333	110	115	4.54545	69	73	5.7971	5.21	4.91	-5.75816	4.37	4.12	-5.72082	3.14	3.25	3.50318	0.95	0.59	-37.8947	0.62	0.61	-1.6129	37.9	35.92	-5.22427
1	26	67.5	65	-3.7037	1.62	25.72	24.77	-3.69362	11.1	12.07	8.73874	20.6	21.84	6.01942	1.8	2.65	47.2222	90	86	-4.44444	127	122	-3.93701	88	83	-5.68182	5.08	4.81	-5.31496	5.89	5.15	-12.5637	3.52	3.67	4.26136	1.93	1.15	-40.4145	0.97	0.7	-27.8351	36.3	34.9	-3.85675
1	29	77	72	-6.49351	1.6	30.08	29.3	-2.59309	11.7	12.3	5.12821	22.2	23.95	7.88288	2.1	2.5	19.0476	85	82	-3.52941	114	115	0.877193	62	62	0	4.72	4.91	4.02542	5.1	4.86	-4.70588	2.86	3.2	11.8881	1.73	1.31	-24.2775	1.12	0.77	-31.25	39.7	37.32	-5.99496
1	28	71	67	-5.6338	1.63	26.72	26.08	-2.39521	19.8	20.6	4.0404	24.9	26.01	4.45783	3.06	3.75	22.549	64	63	-1.5625	110	113	2.72727	62	65	4.83871	4.89	4.54	-7.15746	4.56	4.51	-1.09649	3.19	3.75	17.5549	0.85	0.51	-40	1.16	0.54	-53.4483	33.1	31.3	-5.43807
1	28	97	92	-5.15464	1.73	32.68	31.41	-3.88617	13.7	14.8	8.0292	25.2	25.97	3.05556	3.26	3.9	19.6319	80	77	-3.75	113	117	3.53982	69	71	2.89855	5.25	5.01	-4.57143	4.99	4.69	-6.01202	2.81	3.32	18.1495	1.74	1.12	-35.6322	0.97	0.54	-44.3299	39.93	37.93	-5.00877
1	34	86.5	81	-6.35838	1.76	27.92	27.18	-2.65043	9.08	10.2	12.3348	18.5	19.7	6.48649	2.23	3.49	56.5022	71	69	-2.8169	113	114	0.884956	66	68	3.0303	5.97	4.96	-16.9179	4.78	4.65	-2.71967	2.59	3.28	26.6409	1.64	1.13	-31.0976	1.21	0.52	-57.0248	36.1	33.8	-6.37119
1	21	89.5	86	-3.91061	1.65	32.87	31.59	-3.89413	9.87	10.09	2.22898	17	17.45	2.64706	1.9	2.9	52.6316	75	73	-2.66667	114	116	1.75439	72	75	4.16667	4.92	4.61	-6.30081	4.15	4.17	0.481928	3.08	2.98	-3.24675	0.7	0.64	-8.57143	0.82	1.2	46.3415	39.1	37.34	-4.50128
1	26	86	80	-6.97674	1.58	34.77	33.65	-3.22117	15.1	16.8	11.2583	22	22.75	3.40909	1.85	2.3	24.3243	82	81	-1.21951	122	120	-1.63934	74	72	-2.7027	5.07	4.86	-4.14201	3.94	3.69	-6.34518	2.7	3.1	14.8148	0.91	0.45	-50.5495	0.74	0.31	-58.1081	41.92	39.04	-6.87023
1	21	79	75	-5.06329	1.68	27.99	27.25	-2.6438	9.8	10.5	7.14286	14.4	15.2	5.55556	2.15	2.83	31.6279	85	83	-2.35294	115	117	1.73913	74	76	2.7027	5.79	4.93	-14.8532	5.35	4.98	-6.91589	2.59	2.95	13.8996	2.24	1.58	-29.4643	1.16	0.98	-15.5172	33	31.32	-5.09091
1	27	79.2	75	-5.30303	1.65	29.09	27.55	-5.29392	8.25	9.8	18.7879	16.2	17.06	5.30864	1.98	2.45	23.7374	77	74	-3.8961	136	125	-8.08824	88	86	-2.27273	4.87	4.91	0.821355	4.2	4.23	0.714286	2.86	3.18	11.1888	1.3	0.75	-42.3077	0.87	0.65	-25.2874	35.6	33.87	-4.85955
1	28	78.8	73.2	-7.1066	1.68	27.92	25.94	-7.09169	16.3	17.75	8.89571	17.9	18.95	5.86592	2.1	2.45	16.6667	78	77	-1.28205	132	127	-3.78788	94	89	-5.31915	5.44	4.97	-8.63971	4.55	4.32	-5.05495	3.25	3.41	4.92308	0.77	0.61	-20.7792	1.18	0.65	-44.9153	36.93	34.38	-6.90496
1	33	84.5	82.2	-2.72189	1.65	31.04	30.19	-2.7384	5.76	6.8	18.0556	12.6	13.03	3.4127	1.89	2.8	48.1481	70	69	-1.42857	124	121	-2.41935	76	74	-2.63158	4.57	4.61	0.875274	4.54	4.48	-1.32159	2.75	2.98	8.36364	1.06	0.99	-6.60377	1.62	1.12	-30.8642	41.51	39.75	-4.23994
1	30	95.8	90.7	-5.32359	1.67	34.35	32.52	-5.32751	10.9	11.7	7.33945	18.2	18.95	4.12088	1.96	2.45	25	78	76	-2.5641	123	120	-2.43902	67	72	7.46269	5.62	4.97	-11.5658	5.95	5.61	-5.71429	4.07	4.27	4.914	1.54	1.04	-32.4675	0.75	0.65	-13.3333	45.11	38.22	-15.2738
	26.375	81.2312	77.2563	-4.86257	1.65	29.9294	28.9088	-3.38597	13.2288	14.1756	8.03331	19.1937	20.04	4.44604	2.245	3.01063	35.0917	76.875	74.75	-2.72755	117.375	117.688	0.544753	72.375	73.4375	1.92508	5.19375	4.88187	-5.67368	4.65375	4.43	-4.59653	3.05812	3.3125	8.85998	1.18125	0.8275	-27.1576	0.966875	0.684375	-26.3548	37.4312	35.305	-5.54098
	4.08044	8.19624	7.63815	1.55664	0.0681175	3.11847	2.97266	1.46546	4.77742	4.88475	5.02631	4.39613	4.52451	1.71426	0.44934	0.554659	15.59	6.52048	6.04979	1.21579	9.10586	4.64354	3.94753	9.92556	7.4652	4.45334	0.376508	0.161708	5.48238	0.654144	0.552099	3.3091	0.391582	0.354467	8.35851	0.567989	0.375278	14.0303	0.271385	0.232951	26.2272	4.01317	3.40094	2.98322
2	25	86	87	1.16279	1.63	32.37	32.74	1.14303	9.7	9.75	0.515464	10.7	10.75	0.46729	2.13	2.23	4.69484	85	84	-1.17647	126	125	-0.793651	77	78	1.2987	5.44	5.51	1.28676	4.17	4.19	0.479616	3.14	2.98	-5.09554	0.7	0.87	24.2857	0.73	0.75	2.73973	39.19	39.64	1.14825
2	25	76.8	77.2	0.520833	1.59	30.38	30.54	0.526662	10.7	10.86	1.49533	11.2	11.29	0.803571	2.2	2.45	11.3636	82	83	1.21951	110	108	-1.81818	67	66	-1.49254	5.2	5.21	0.192308	4.28	4.31	0.700935	3.19	3.02	-5.32915	0.68	0.84	23.5294	0.91	0.98	7.69231	36.9	36.9	0
2	25	87.3	88.5	1.37457	1.61	33.68	34.14	1.3658	13.2	13.45	1.89394	12.4	12.35	-0.403226	2.14	2.1	-1.86916	80	81	1.25	115	114	-0.869565	66	66	0	5.36	5.29	-1.30597	4.45	4.43	-0.449438	3.03	2.75	-9.24092	1.03	1.17	13.5922	0.87	1.13	29.8851	40.63	41.09	1.13217
2	23	76.5	77.8	1.69935	1.62	29.15	29.64	1.68096	12.2	12.6	3.27869	13.1	13.15	0.381679	2.4	2.35	-2.08333	78	79	1.28205	120	119	-0.833333	78	77	-1.28205	5.86	5.91	0.853242	4.5	4.41	-2	3.47	3.12	-10.0865	0.8	0.99	23.75	0.53	0.67	26.4151	35.1	35.1	0
2	23	88.3	90	1.92525	1.6	34.49	35.16	1.94259	13.2	13.41	1.59091	12.2	12.16	-0.327869	2.37	2.1	-11.3924	78	78	0	113	113	0	65	66	1.53846	5.11	5.21	1.95695	3.9	4.23	8.46154	2.92	2.99	2.39726	0.7	0.94	34.2857	0.62	0.67	8.06452	41.14	42.08	2.28488
2	24	73.4	75	2.17984	1.62	27.97	28.58	2.18091	14.6	14.7	0.684932	15.2	15.23	0.197368	2.41	2.33	-3.3195	76	77	1.31579	118	117	-0.847458	77	76	-1.2987	5.1	5.12	0.392157	4.89	5.1	4.29448	3.63	3.61	-0.550964	1.02	1.17	14.7059	0.53	0.71	33.9623	33.5	34.41	2.71642
2	23	68.5	68	-0.729927	1.6	26.76	26.56	-0.747384	15.2	15.33	0.855263	17.7	17.9	1.12994	2.34	2.45	4.70085	78	79	1.28205	125	128	2.4	68	67	-1.47059	5.1	5.16	1.17647	4.89	4.88	-0.204499	2.97	2.79	-6.06061	1.4	1.72	22.8571	1.15	0.81	-29.5652	32.23	31.77	-1.42724
2	23	69.5	71	2.15827	1.61	26.81	27.39	2.16337	22.3	22.41	0.493274	23.6	22.96	-2.71186	2.53	2.63	3.95257	75	77	2.66667	128	130	1.5625	73	70	-4.10959	5.51	5.61	1.81488	4.62	4.8	3.8961	3.03	2.87	-5.28053	1.08	1.53	41.6667	1.15	0.89	-22.6087	31.83	32.76	2.92177
2	21	87.2	88.5	1.49083	1.62	33.23	33.72	1.47457	13.2	13.33	0.984848	13	12.75	-1.92308	2.67	2.48	-7.1161	75	75	0	131	132	0.763359	79	77	-2.53165	5.31	5.26	-0.94162	3.15	3.96	25.7143	2.86	2.99	4.54545	0.13	0.78	500	0.35	0.41	17.1429	39.21	40.13	2.34634
2	23	80.4	82	1.99005	1.61	31.02	31.63	1.96647	12.7	12.64	-0.472441	11.9	12.03	1.09244	2.7	2.65	-1.85185	74	74	0	120	120	0	77	76	-1.2987	5.63	5.81	3.19716	3.98	4.35	9.29648	3.08	3.12	1.2987	0.16	0.91	468.75	1.63	0.7	-57.0552	36.93	37.85	2.4912
2	21	67	68	1.49254	1.62	25.53	25.91	1.48844	18.6	18.56	-0.215054	18.4	18.09	-1.68478	2.82	2.83	0.35461	76	77	1.31579	131	132	0.763359	79	78	-1.26582	5.49	5.57	1.45719	4.33	4.75	9.69977	3.08	3.15	2.27273	0.69	1.15	66.6667	1.24	0.98	-20.9677	33.98	30.52	-10.1825
1 = Experimental group
2 = Control Group
